# Supplementary material
Source: ML conference proceedings conference paper supplement (https://proceedings.mlr.press/v48/korba16.html)
Supplement: Supplementary file 1 [file korba16-supp.pdf]

---

# Supplementary Material for the paper “Controlling the distance to a Kemeny consensus without computing it”

---

## 1. Examples of voting rules

We elaborate in detail the voting rules used in the paper to approximate Kemeny’s rule. Note that if multiple consensus are returned from a rule on a given dataset, we randomly pick one from these consensus.

**Positional scoring rules.** Given a scoring vector  $w = (w_1, \dots, w_n) \in \mathbb{R}^n$  of weights respectively for each alternative in  $[[n]]$ , the  $i$ th alternative in a vote scores  $w_i$ . A full ranking is given by sorting the averaged scores over all votes, for example, the winner is the alternative with highest total score over all the votes. The **plurality** rule has the weight vector  $(1, 0, \dots, 0)$ , the  **$k$ -approval** rule has  $(1, \dots, 1, 0, \dots, 0)$  containing 1s in the first  $k$  positions, and the **Borda** rule has  $(n, n - 1, \dots, 1)$ .

**Copeland.** A full ranking is given by sorting the Copeland scores averaged over all votes, for which the score of alternative  $i$  is  $\sum_{j \neq i} \text{beats}(i, j)$ . For example, the Copeland winner is the alternative that wins the most pairwise elections.

**QuickSort.** (Ali & Meilă, 2012) QuickSort recursively divides an unsorted list into two lists – one list comprising alternatives that occur before a chosen index (called the *pivot*), and another comprising alternatives that occur after, and then sorts each of the two lists. The pivot is always chosen as the first alternative.

**Pick-a-Perm.** (Ali & Meilă, 2012) A full ranking is picked randomly from  $\mathfrak{S}_n$  according to the empirical distribution of the dataset  $\mathcal{D}_N$ .

**Plackett-Luce.** A Plackett-Luce ranking model defined for any  $\sigma \in \mathfrak{S}_n$  by  $p_w(\sigma) = \prod_{i=1}^n w_{\sigma(i)} / \left( \sum_{j=i}^n w_{\sigma(j)} \right)$  parameterized by  $w = (w_1, \dots, w_n) \in \mathbb{R}^n$ , fitted to  $\mathcal{D}_N$  by means of the MM algorithm (Hunter, 2004). A full ranking is then given by sorting  $w$ .

**Pick-a-Random.** A full ranking is picked randomly from  $\mathfrak{S}_n$  according to uniform law (independent from  $\mathcal{D}_N$ ). Qualitatively speaking Pick-a-Random is expected as a negative control experiment. To intuitively understand the rationale behind Pick-a-Random, let us consider the case conditioned on that the output of a voting rule has (at least) certain Kendall’s tau distance to the Kemeny consensus.

Compared to what Pick-a-Random would blindly pick any permutation without accessing to the dataset  $\mathcal{D}_N$  at all, a sensible voting rule should have a better chance to output one permutation with a smaller angle  $\theta$  with  $\phi(\mathcal{D}_N)$  among all the permutations that share the same distance to Kemeny consensus. As we have reasoned in the geometric proof of the method that the smaller the angle  $\theta$  is, the more applicable our method will be, Pick-a-Random is expected to perform worse than other voting rules in terms of applicability of our method.

## References

- Ali, A. and Meilă, M. Experiments with kemeny ranking: What works when? *Mathematical Social Sciences*, 64 (1):28–40, 2012.
- Hunter, D. R. MM algorithms for generalized bradley-terry models. *Annals of Statistics*, pp. 384–406, 2004.

000  
001  
002  
003  
004  
005  
006  
007  
008  
009  
010  
011  
012  
013  
014  
015  
016  
017  
018  
019  
020  
021  
022  
023  
024  
025  
026  
027  
028  
029  
030  
031  
032  
033  
034  
035  
036  
037  
038  
039  
040  
041  
042  
043  
044  
045  
046  
047  
048  
049  
050  
051  
052  
053  
054

055  
056  
057  
058  
059  
060  
061  
062  
063  
064  
065  
066  
067  
068  
069  
070  
071  
072  
073  
074  
075  
076  
077  
078  
079  
080  
081  
082  
083  
084  
085  
086  
087  
088  
089  
090  
091  
092  
093  
094  
095  
096  
097  
098  
099  
100  
101  
102  
103  
104  
105  
106  
107  
108  
109
